# Supplementary material for: Tuning the electronic and magnetic properties of graphene-like SiGe hybrid nanosheets by surface functionalization
Source: Royal Society of Chemistry journal article supplement (doi:10.1039/c6cp04756d), 2016-01-01
Supplement: c6cp04756d1.pdf [file c6cp04756d1.pdf]

**Supplementary Information for:**

Tuning electronic and magnetic properties of graphenelike SiGe hybrid nanosheets by surface functionalization

W.X. Zhang <sup>1,2</sup>, Y.B. Wang <sup>1</sup>, P. Zhao <sup>1</sup>, C. He<sup>3,\*</sup>

<sup>1</sup> School of Materials Science and Engineering, Chang'an University, Xi'an 710064, China;

<sup>2</sup> Centre for Clean Energy Technology, School of Chemistry and Forensic Science, University of Technology Sydney, Broadway, Sydney, NSW 2007, Australia

<sup>3</sup> State Key Laboratory for Mechanical Behavior of Materials, School of Materials Science and Engineering, Xi'an Jiaotong University, Xi'an 710049, China;

---

\* Corresponding Author: C. He; E-mail address: hecheng@mail.xjtu.edu.cn

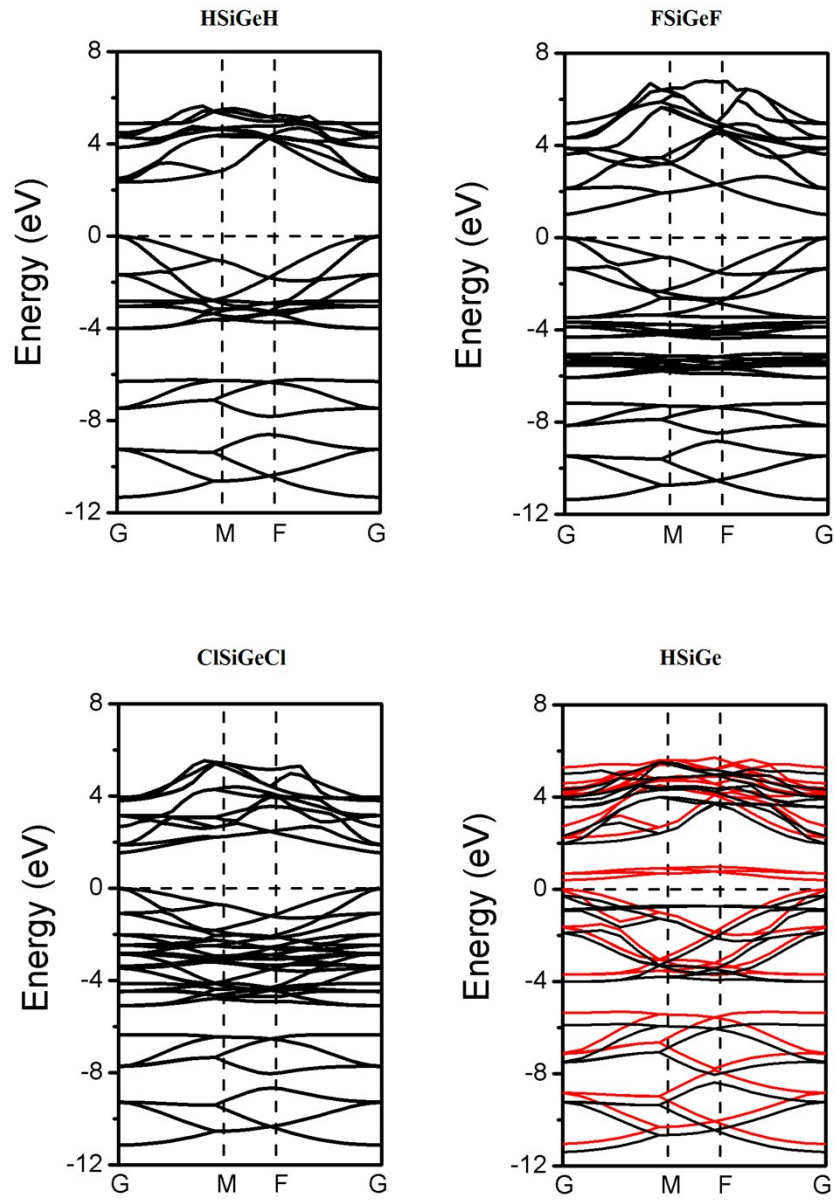

Fig.1S. The calculated band structures with HSE06 hybrid functional of HSiGeH, FSiGeF, ClSiGeCl, and HSiGe NSs, respectively. Black and red lines denote up-spin and down-spin band respectively.

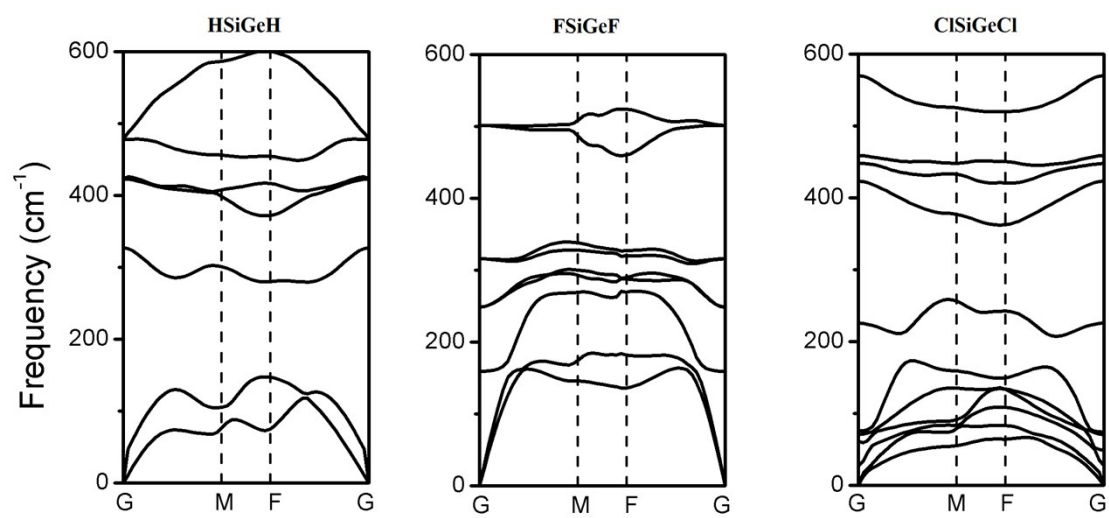

Fig.2S. The calculated phonon band dispersions of XSiGeX NSs, where X are H, F or Cl.
